# Supplementary material for: The energy level of the Fe2+/3+-transition in BaTiO3 and SrTiO3 single crystals
Source: Royal Society of Chemistry journal article supplement (doi:10.1039/c8cp07872f), 2019-01-01
Supplement: c8cp07872f1.pdf [file c8cp07872f1.pdf]

Supporting Information for

The energy level of the  $\text{Fe}^{2+/3+}$ -transition in  $\text{BaTiO}_3$  and  $\text{SrTiO}_3$  single crystals

Issei Suzuki, Leonard Gura, Andreas Klein

Technische Universität Darmstadt, Institute of Materials Science, Surface Science Division, Otto Berndt-

Strasse 3, Darmstadt, 64287, Germany

**The Reproducibility of the stepwise re-oxidation experiment**

In addition to the sample in the main text which was prepared by reducing in the vacuum (sample 1), second sample (sample 2) was prepared by reducing in  $\text{H}_2/\text{Ar}$  atmosphere. In the preparation of sample 2, the  $\text{BaTiO}_3$  was annealed in the glass tube with a  $\text{H}_2$  5%—Ar gas flow at 60 sccm for 12h at  $800^\circ\text{C}$  and subsequently quenched to the room temperature without being exposed to the air. Pt electrodes were deposited on both surfaces without surface cleaning unlike the sample 1.

Figure S1 (a) shows Arrhenius plots of the samples 1 and 2. The conductivity of two samples went down in a quite similar way except for some points; in particular, the temperature at which the conductivity starts deviating from linear line was slightly different between sample 1 ( $\sim 250^\circ\text{C}$ ) and Sample 2 ( $\sim 270^\circ\text{C}$ ) and the decrement of the conductivity observed in each loop was wider in sample 2 than sample 1. Nevertheless, Figure S1(b) shows that the evolutions of the activation energy of two samples, which were almost identical to each other confirming the reproducibility of a relationship between the evolution of the conductivity and that of activation energy.

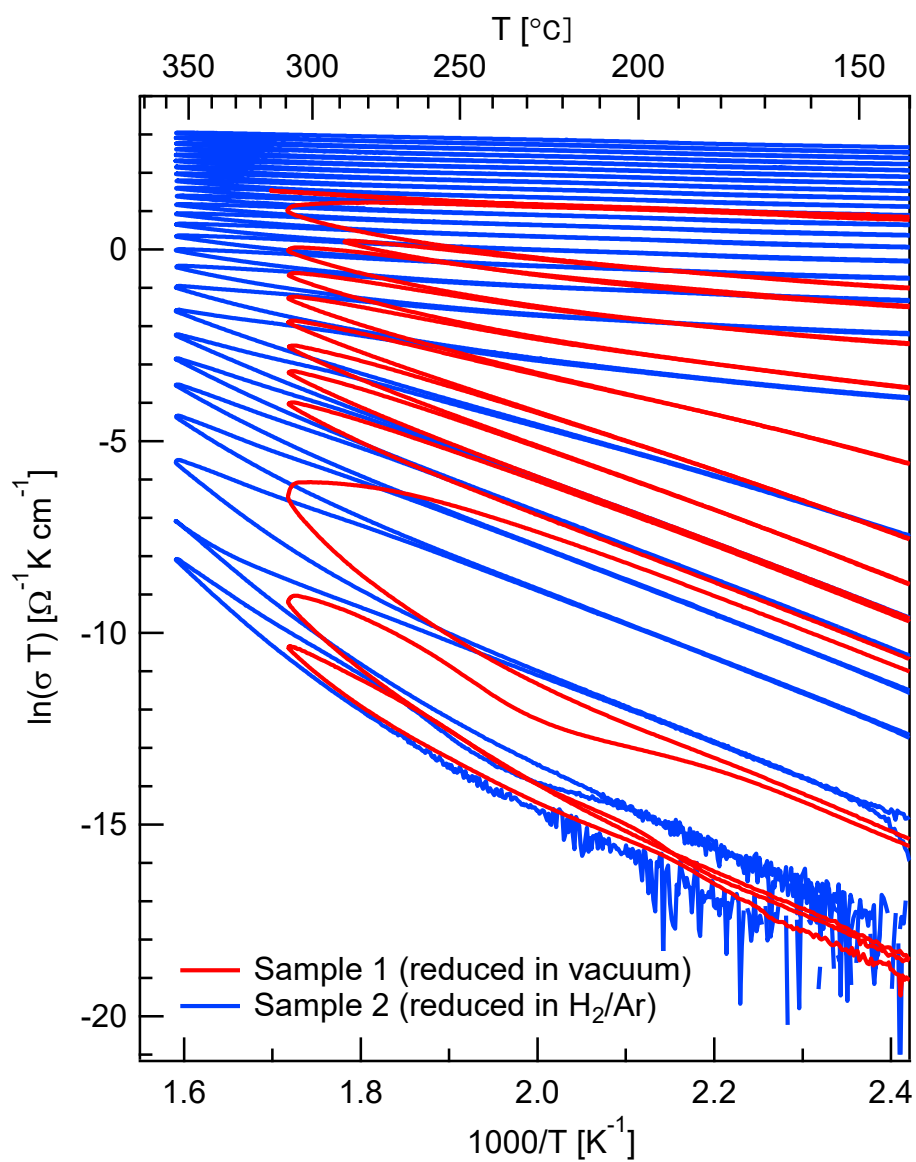

Figure S1. Conductivity of  $\text{BaTiO}_3$  samples during stepwise re-oxidation.

Table S1. The impurity concentrations measured by GDMS technique

| Elements | Concentration<br>(ppm) | Concentration<br>(cm <sup>-3</sup> ) | Elements | Concentration<br>(ppm) | Concentration<br>(cm <sup>-3</sup> ) |
|----------|------------------------|--------------------------------------|----------|------------------------|--------------------------------------|
| Li       | < 0.05                 | < 2.6×10 <sup>16</sup>               | Pd       | < 0.5                  | < 1.7×10 <sup>16</sup>               |
| Be       | < 0.01                 | < 4.0×10 <sup>15</sup>               | Ag       | < 100                  | < 3.4×10 <sup>18</sup>               |
| B        | 0.05                   | 1.7×10 <sup>16</sup>                 | Cd       | < 1                    | < 3.2×10 <sup>16</sup>               |
| F        | 1                      | 1.9×10 <sup>17</sup>                 | In       | 0.5                    | 1.6×10 <sup>16</sup>                 |
| Na       | < 5.4                  | < 8.5×10 <sup>17</sup>               | Sn       | 4.6                    | 1.4×10 <sup>17</sup>                 |
| Mg       | 0.66                   | 9.8×10 <sup>16</sup>                 | Sb       | < 0.79                 | < 2.4×10 <sup>16</sup>               |
| Al       | 0.26                   | 3.5×10 <sup>16</sup>                 | Te       | 10                     | 2.8×10 <sup>17</sup>                 |
| Si       | 0.55                   | 7.1×10 <sup>16</sup>                 | I        | 0.1                    | 2.9×10 <sup>15</sup>                 |
| P        | < 0.1                  | < 1.2×10 <sup>16</sup>               | Cs       | 0.1                    | 2.7×10 <sup>15</sup>                 |
| S        | < 0.1                  | < 1.1×10 <sup>16</sup>               | La       | < 0.5                  | < 1.3×10 <sup>16</sup>               |
| Cl       | < 0.1                  | < 1.0×10 <sup>16</sup>               | Ce       | < 0.05                 | < 1.3×10 <sup>15</sup>               |
| K        | < 0.1                  | < 9.3×10 <sup>15</sup>               | Pr       | < 0.05                 | < 1.3×10 <sup>15</sup>               |
| Ca       | 95                     | 8.6×10 <sup>18</sup>                 | Nd       | 0.05                   | 1.3×10 <sup>15</sup>                 |
| Sc       | < 0.5                  | < 4.0×10 <sup>16</sup>               | Sm       | < 0.1                  | < 2.4×10 <sup>15</sup>               |
| V        | < 0.05                 | < 3.6×10 <sup>15</sup>               | Eu       | < 0.05                 | < 1.2×10 <sup>15</sup>               |
| Cr       | 0.36                   | 2.5×10 <sup>16</sup>                 | Gd       | 0.05                   | 1.2×10 <sup>15</sup>                 |
| Mn       | 0.11                   | 7.3×10 <sup>15</sup>                 | Tb       | 5                      | 1.1×10 <sup>17</sup>                 |
| Fe       | 4.7                    | 3.0×10 <sup>17</sup>                 | Dy       | 0.05                   | 1.1×10 <sup>15</sup>                 |
| Co       | < 0.05                 | < 3.1×10 <sup>15</sup>               | Ho       | < 0.05                 | < 1.1×10 <sup>15</sup>               |
| Ni       | 0.36                   | 2.2×10 <sup>16</sup>                 | Er       | 0.05                   | 1.1×10 <sup>15</sup>                 |
| Cu       | < 0.5                  | < 2.9×10 <sup>16</sup>               | Tm       | < 0.05                 | < 1.1×10 <sup>15</sup>               |
| Zn       | < 1                    | < 5.5×10 <sup>16</sup>               | Yb       | < 0.05                 | < 1.0×10 <sup>15</sup>               |
| Ga       | < 0.05                 | < 2.6×10 <sup>15</sup>               | Lu       | < 0.05                 | < 1.0×10 <sup>15</sup>               |
| Ge       | < 0.5                  | < 2.5×10 <sup>16</sup>               | Hf       | < 0.5                  | < 1.0×10 <sup>16</sup>               |
| As       | < 0.1                  | < 4.8×10 <sup>15</sup>               | W        | < 5                    | < 9.9×10 <sup>16</sup>               |
| Se       | < 0.1                  | < 4.6×10 <sup>15</sup>               | Re       | < 0.05                 | < 9.7×10 <sup>14</sup>               |
| Br       | < 0.1                  | < 4.5×10 <sup>15</sup>               | Os       | < 0.05                 | < 9.5×10 <sup>14</sup>               |
| Rb       | < 5                    | < 2.1×10 <sup>17</sup>               | Ir       | < 0.05                 | < 9.4×10 <sup>14</sup>               |
| Sr       | ≤ 1100                 | ≤ 4.5×10 <sup>19</sup>               | Pt       | < 0.5                  | < 9.3×10 <sup>15</sup>               |
| Y        | < 100                  | < 4.1×10 <sup>18</sup>               | Hg       | < 0.1                  | < 1.8×10 <sup>15</sup>               |
| Zr       | 780                    | 3.1×10 <sup>19</sup>                 | Tl       | < 0.05                 | < 8.9×10 <sup>14</sup>               |
| Nb       | < 50                   | < 2.0×10 <sup>18</sup>               | Pb       | < 0.05                 | < 8.7×10 <sup>14</sup>               |
| Mo       | < 5                    | < 1.9×10 <sup>17</sup>               | Bi       | < 0.01                 | < 1.7×10 <sup>14</sup>               |
| Ru       | < 0.1                  | < 3.6×10 <sup>15</sup>               | Th       | < 0.01                 | < 1.6×10 <sup>14</sup>               |
| Rh       | < 0.2                  | < 7.0×10 <sup>15</sup>               | U        | < 0.01                 | < 1.5×10 <sup>14</sup>               |
